# Supplementary material
Source: Springer Nature journal article supplement (https://www.springermedizin.de/resource/supplementary/12936_2011_1904_MOESM3_ESM.pdf/9542050)
Supplement: MOESM3 [file 9542050]

|                                         |                                                                                                                                                                                  |
|-----------------------------------------|----------------------------------------------------------------------------------------------------------------------------------------------------------------------------------|
| <b>Quality-assured ACT</b>              | <b>ACTs that either have been pre-qualified by the WHO or appear in UNICEF procurement records. This category of ACT is considered to meet international quality standards.</b>  |
| <b>Non-artemisinin monotherapy</b>      | This includes monotherapies that do not contain artemisinin, such as amodiaquine, chloroquine, halofatrine, quinine, sulfadoxine-pyrimethamine, etc.                             |
| <b>Oral artemisinin monotherapy</b>     | All oral formulations of artemisinin monotherapy – which WHO recommended be banned due to the effect on artemisinin resistance.                                                  |
| <b>Non-oral artemisinin monotherapy</b> | Non-oral formulations of artemisinin including suppositories and injectables that are recommended by WHO for the management of severe malaria, including pre-referral treatment. |
